# Supplementary material
Source: Springer Nature journal article supplement (https://www.springermedizin.de/resource/supplementary/12968_2012_3270_MOESM6_ESM.pdf/9583514)

**a**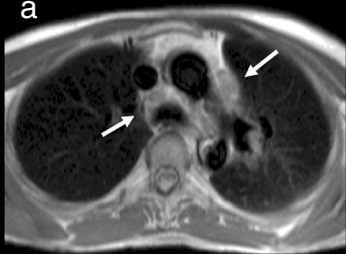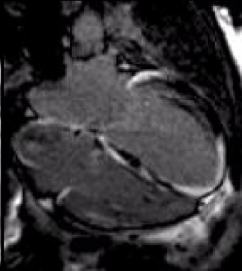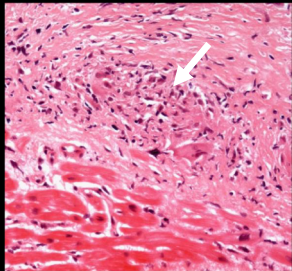**b**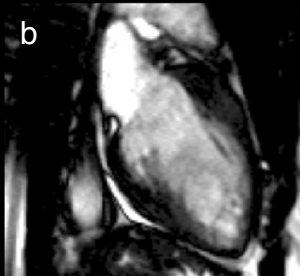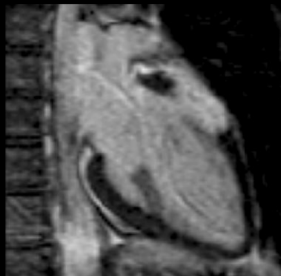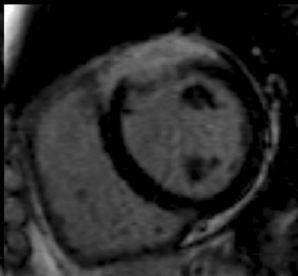

Supplement: MOESM6 [file 9583514]
